# Supplementary material for: Molecular architecture of the C. elegans centriole
Source: PubMed Central journal article supplement (PMC9531800; doi:10.1371/journal.pbio.3001784), 2022-09-15
Supplement: pbio.3001784.s003.pdf [file pbio.3001784.s003.pdf]

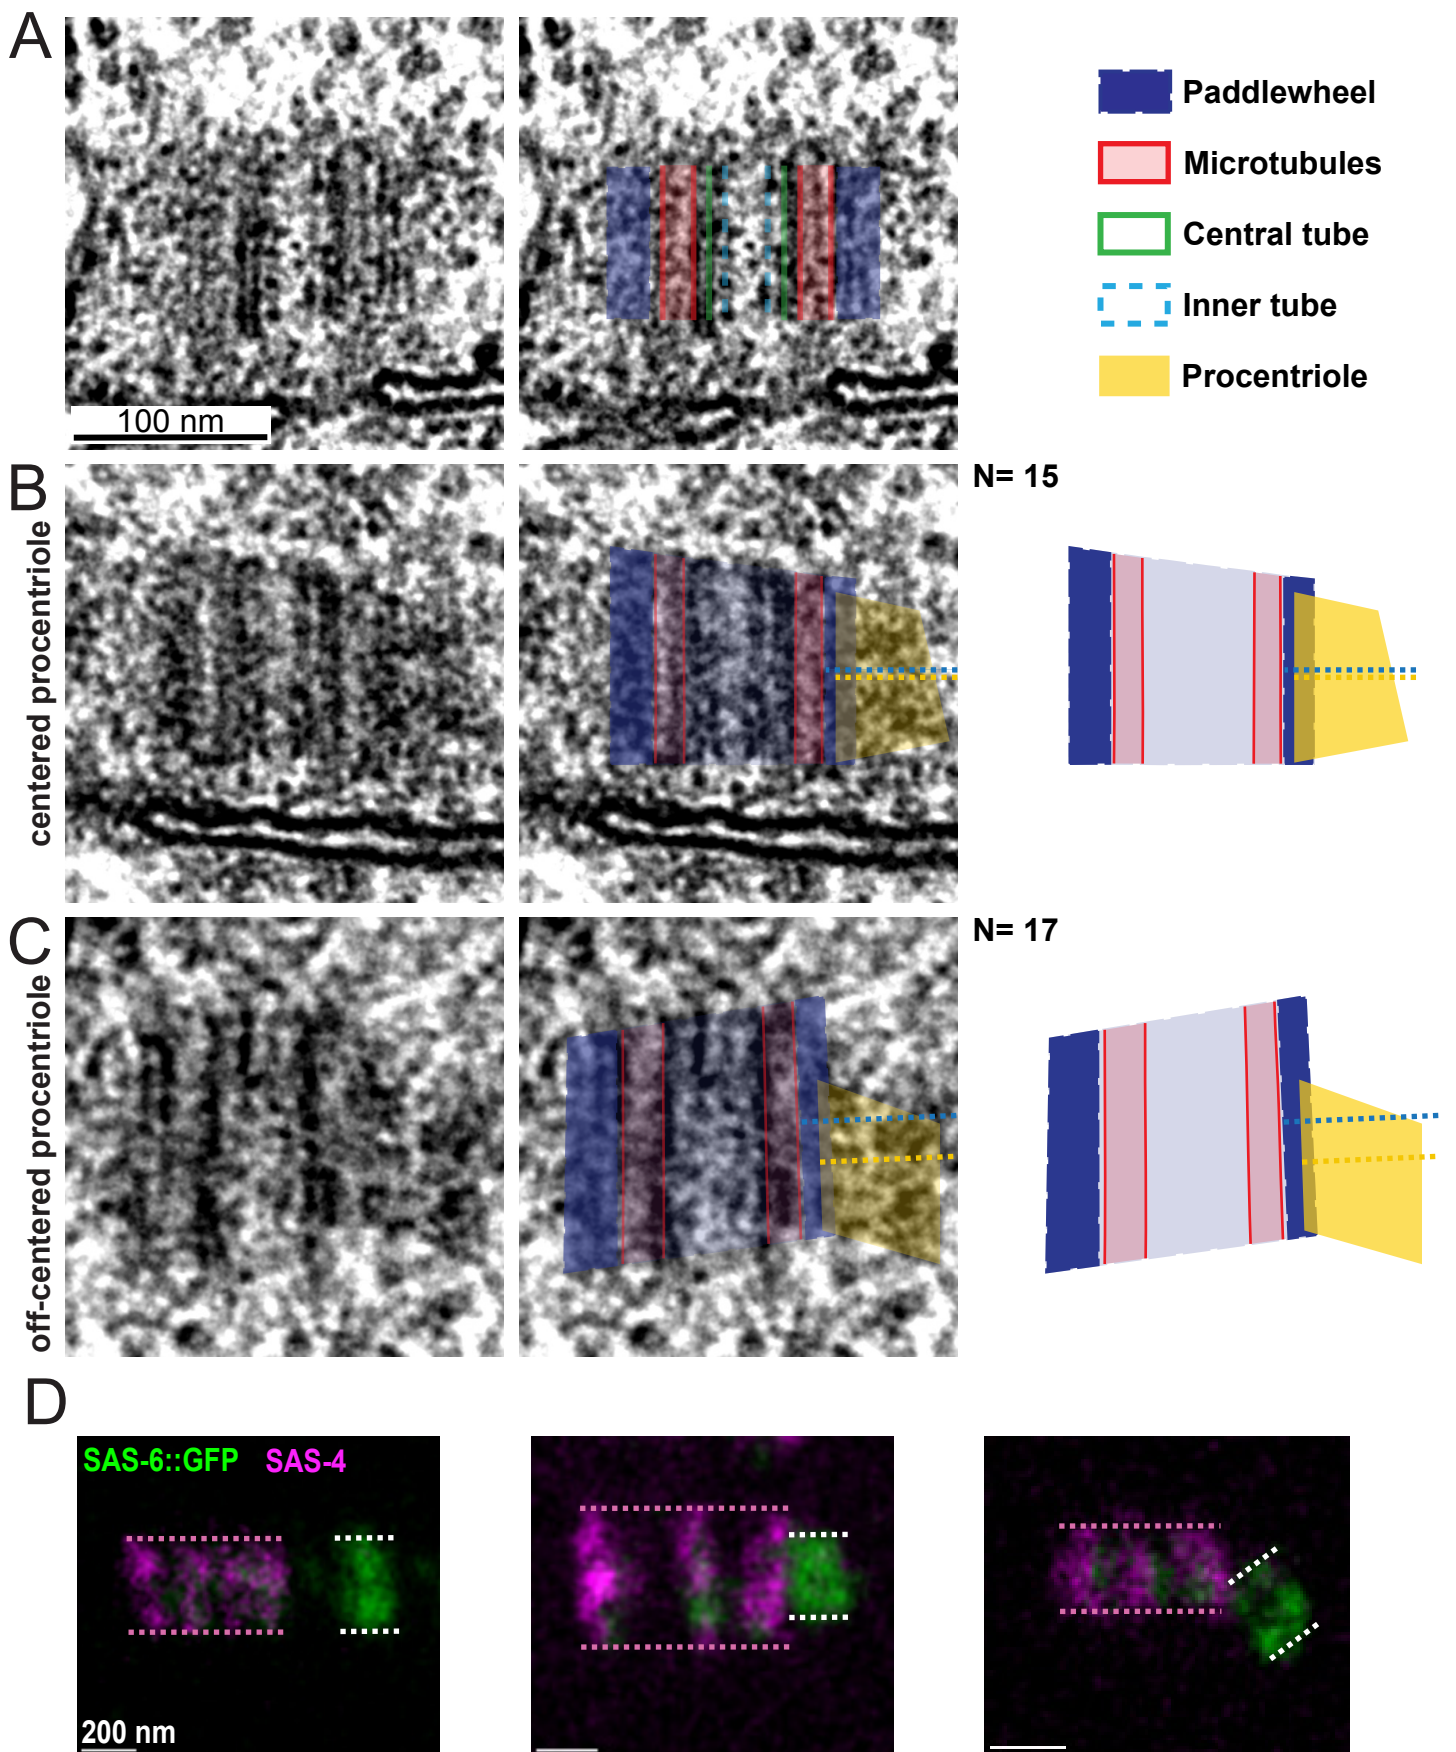

Figure S3
